# Supplementary material for: Bacteria isolated from the cuticle of plant-parasitic nematodes attached to and antagonized the root-knot nematode Meloidogyne hapla
Source: PubMed Central journal article supplement (PMC6685954; doi:10.1038/s41598-019-47942-7), 2019-08-07
Supplement: 41598_2019_47942_MOESM1_ESM.pdf [file 41598_2019_47942_MOESM1_ESM.pdf]

## Supplement to

### “Bacteria isolated from the cuticle of plant-parasitic nematodes attached to and antagonized the root-knot nematode *Meloidogyne hapla*”

Olivera Topalović<sup>1</sup>, Ahmed Elhady<sup>1,2</sup>, Johannes Hallmann<sup>1</sup>, Katja R. Richert-Pöggeler<sup>1</sup>, Holger Heuer<sup>1\*</sup>

<sup>1</sup> Dept. Epidemiology and Pathogen Diagnostics, Julius Kühn-Institut — Federal Research Centre for Cultivated Plants, Braunschweig, Germany

<sup>2</sup> Department of Plant Protection, Faculty of Agriculture, Benha University, Benha, Egypt

\*Correspondence: [holger.heuer@julius-kuehn.de](mailto:holger.heuer@julius-kuehn.de)

#### Supplementary Table S1. Identification of bacterial strains that were highly attached to J2 of *Meloidogyne hapla* or *Pratylenchus penetrans*, using 16S rRNA gene sequencing.

| Isolates    | Soil source                       | GenBank BLAST hit                    | Accession ID, % identity |
|-------------|-----------------------------------|--------------------------------------|--------------------------|
| S10-12 (Mh) | Sickte (field 10)                 | <i>Acinetobacter</i> sp.             | KX_982223.1, 99%         |
| E1 (Mh)     | Elsdorf                           | <i>Acinetobacter</i> sp.             | KJ_147068.1, 99%         |
| i.44 (Mh)   | Geisenheim                        | <i>Microbacterium foliorum</i>       | CP_019892.1, 99%         |
| i.47 (Mh)   | Geisenheim                        | <i>Microbacterium</i> sp.            | CP_018151.1, 99%         |
| BS1-7 (Mh)  | Dahnsdorf (field BS1)             | <i>Brevundimonas vesicularis</i>     | MH_144292.1, 99%         |
| S5-5 (Mh)   | Quedlinburg (Schlag 5)            | <i>Brevundimonas</i> sp.             | KY_907035.1, 99%         |
| G1 (Mh)     | Geisenheim                        | <i>Kocuria uropiqioeca</i>           | NR_157676.1, 99%         |
| i.10 (Mh)   | Geisenheim                        | <i>Microbacterium phyllosphaerae</i> | NR_025405.1, 99%         |
| K5 (Mh)     | Klein Wanzleben                   | <i>Micrococcus</i> sp.               | MH_671525.1, 99%         |
| G11 (Mh)    | Geisenheim                        | <i>Sphingopyxis</i> sp.              | EF_540469.1, 99%         |
| BS1-2 (Mh)  | Dahnsdorf (Schlag 2)              | <i>Sphingopyxis</i> sp.              | AB_161684.1, 99%         |
| K6 (Mh)     | Klein Wanzleben                   | <i>Microbacterium</i> sp.            | MG_266365.1, 99%         |
| K1 (Mh)     | Klein Wanzleben                   | <i>Staphylococcus equorum</i>        | MF_578770.1, 99%         |
| i.20 (Mh)   | Geisenheim                        | <i>Microbacterium</i> sp.            | EU_747700.1, 99%         |
| i.14 (Pp)   | Bundesallee (bulk soil)           | <i>Microbacterium oxydans</i>        | MF_459692.1, 100%        |
| i.27 (Pp)   | Bundesallee (maize rhizosphere)   | <i>Pseudomonas protegens</i>         | NR_114749.1, 100%        |
| i.37 (Pp)   | Bundesallee (soybean rhizosphere) | <i>Alcaligenes faecalis</i>          | NR_113606.1, 100%        |
